# Supplementary material
Source: publisher figshare collection journal article supplement (https://acs.figshare.com/ndownloader/files/10700080)
Supplement: Supplementary file 1 [file 10700080]

# Supporting Information

## Synthesis of Nitrosobenzene Derivatives via Nitrosodesilylation Reaction

Corinna Kohlmeyer, Maike Klüppel and Gerhard Hilt

*a) Institut für Chemie, Universität Oldenburg, Carl-von-Ossietzky-Straße 9-11, 26111*

*Oldenburg, Germany*

*b) Fachbereich Chemie, Philipps-Universität Marburg, Hans-Meerwein-Straße 4, 35043*

*Marburg, Germany*

Email: [Gerhard.Hilt@uni-oldenburg.de](mailto:Gerhard.Hilt@uni-oldenburg.de)

### Table of content

|                                         |     |
|-----------------------------------------|-----|
| NMR analysis of the nitrosodesilylation | S-1 |
| NMR Spectra                             | S-9 |

## NMR analysis of the nitrosodesilylation

### $^1\text{H}$ , $^{19}\text{F}$ and $^{29}\text{Si}$ NMR analysis of the reaction mixture

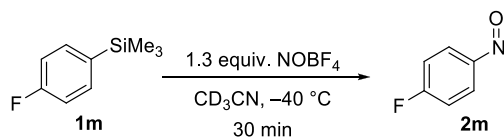

**Scheme S1:** Reaction conditions for examination of the mechanism by NMR analysis.

A round bottom flask was charged with acetonitrile (8.3 mL, 0.03 M), and (4-fluorophenyl)trimethylsilane **1m** (42.1 mg, 0.25 mmol, 1.0 equiv.) and cooled to  $-40\text{ }^\circ\text{C}$ . After adding  $\text{NOBF}_4$  (38.0 mg, 0.33 mmol, 1.3 equiv.) the reaction mixture was stirred for 30 min. Then, the NMR probe was prepared and  $^1\text{H}$  NMR,  $^{19}\text{F}$  NMR and  $^{29}\text{Si}\{^1\text{H}\}$  INEPT spectra were recorded. After that a small amount of water was added to the NMR tube and once again  $^1\text{H}$  NMR,  $^{19}\text{F}$  NMR and  $^{29}\text{Si}\{^1\text{H}\}$  INEPT spectra were recorded.

#### Resolved signals of $\text{Me}_3\text{SiF}$ :

$^1\text{H}$  NMR (500 MHz,  $\text{CD}_3\text{CN}$ , ppm):  $\delta = 0.22$  (d,  $J = 7.4$  Hz, 9H).

$^{19}\text{F}$  NMR (470 MHz,  $\text{CD}_3\text{CN}$ , ppm):  $\delta = -158.0$ .

$^{29}\text{Si}\{^1\text{H}\}$  INEPT NMR (99 MHz,  $\text{CD}_3\text{CN}$ , ppm):  $\delta = 33.6$  (d,  $J = 272.6$  Hz).

The analytic data are in accordance with the literature.<sup>[1]</sup>

## Spectra of the reaction mixture

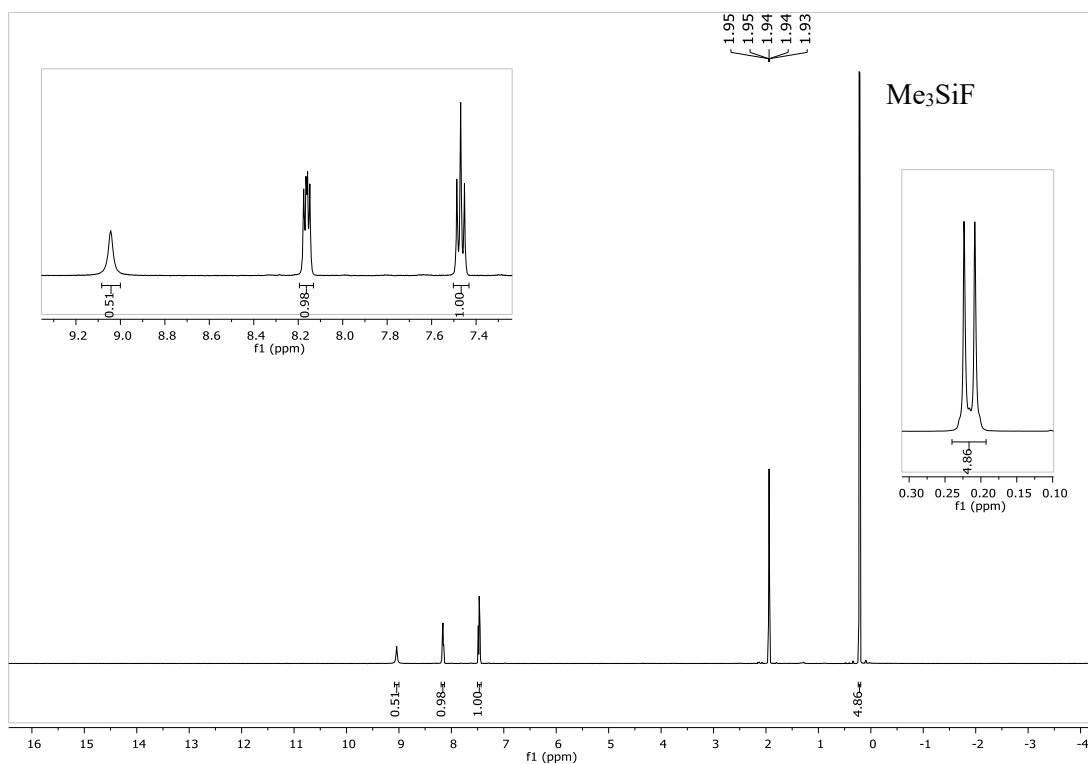

**Figure S1:** <sup>1</sup>H NMR spectrum (CD<sub>3</sub>CN, 500 MHz) of the reaction mixture.

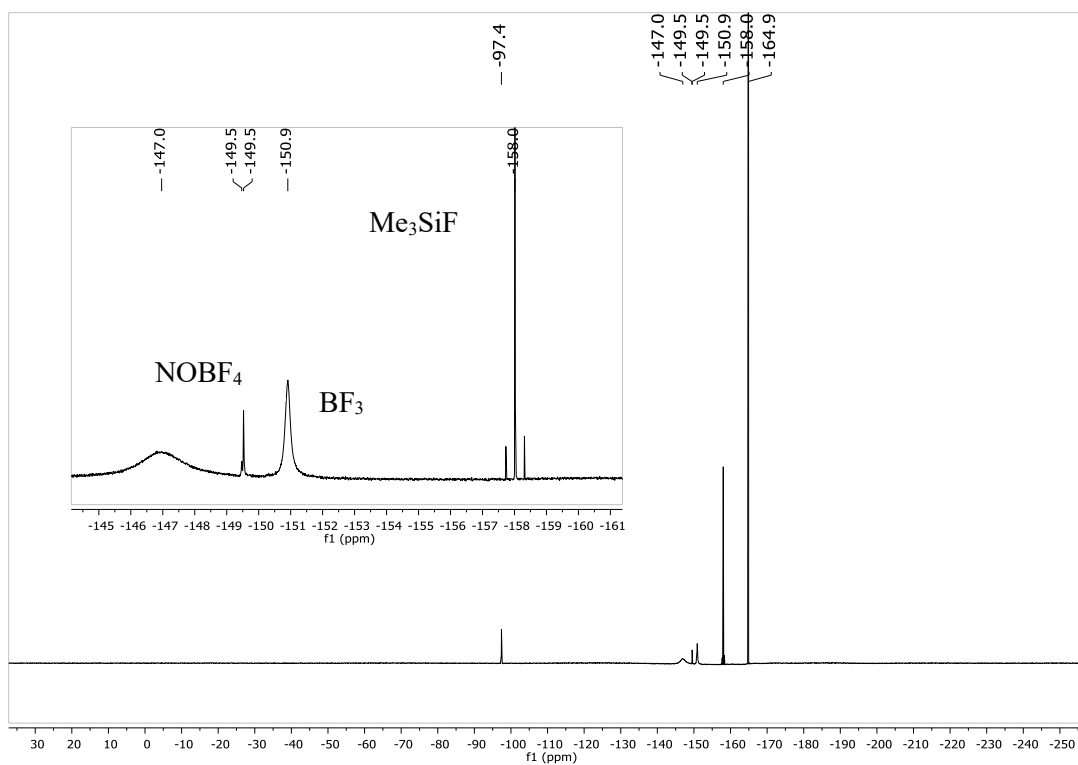

**Figure S2:** <sup>19</sup>F NMR spectrum (CD<sub>3</sub>CN, 470 MHz) of the reaction mixture. C<sub>6</sub>F<sub>6</sub> ( $\delta(^{19}\text{F}) = -164.9$  ppm) was used as internal standard.

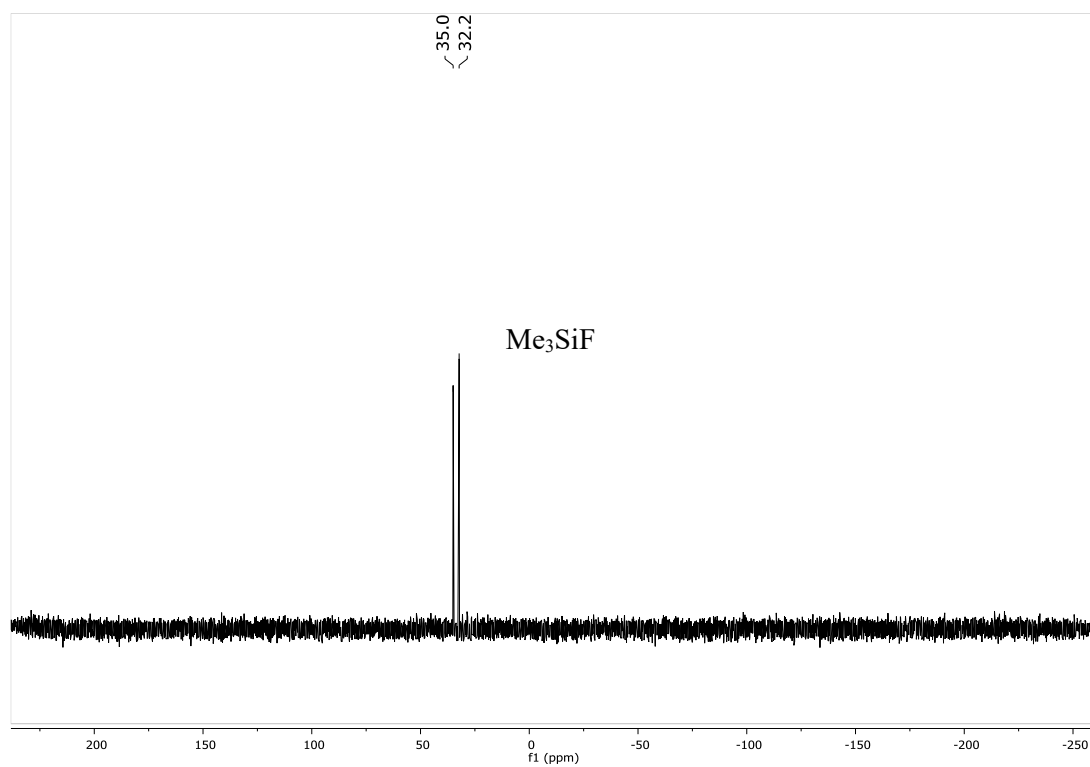

**Figure S3:**  $^{29}\text{Si}\{^1\text{H}\}$  INEPT NMR spectrum ( $\text{CD}_3\text{CN}$ , 99 MHz) of the reaction mixture.

## Spectra after the addition of a slightly amount of water

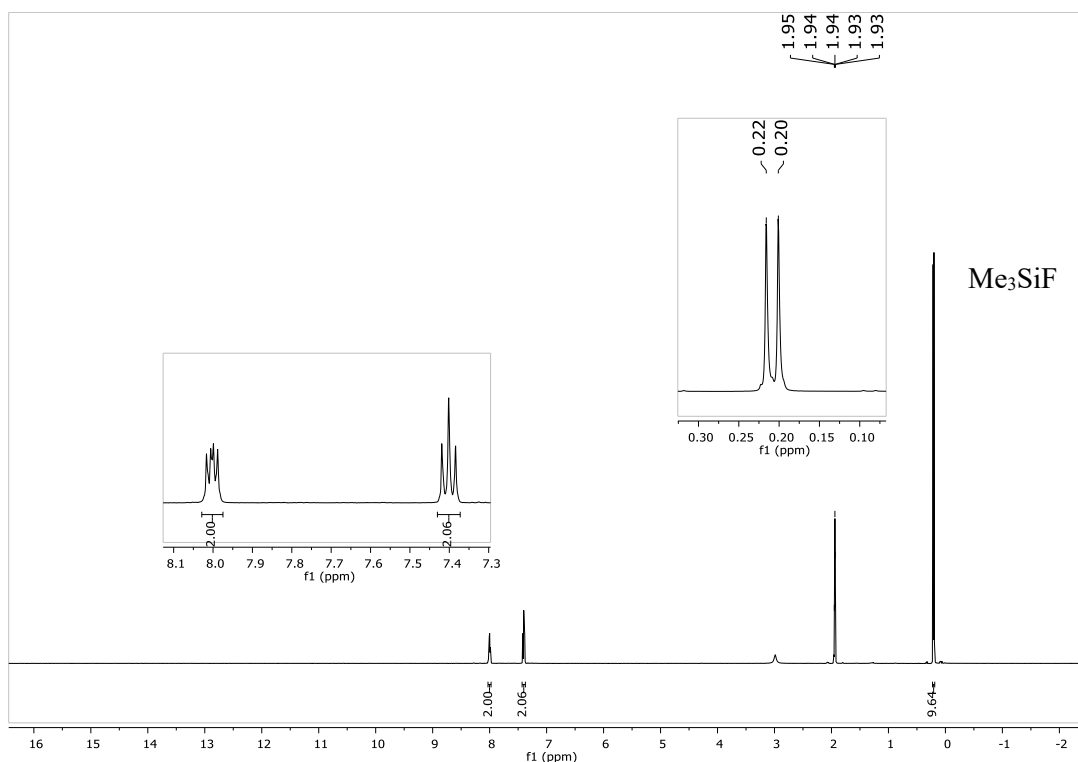

**Figure S4:**  $^1\text{H}$  NMR spectrum ( $\text{CD}_3\text{CN}$ , 500 MHz) after the addition of water.  $\text{C}_6\text{F}_6$  ( $\delta(^{19}\text{F}) = -164.9$  ppm) was used as internal standard.

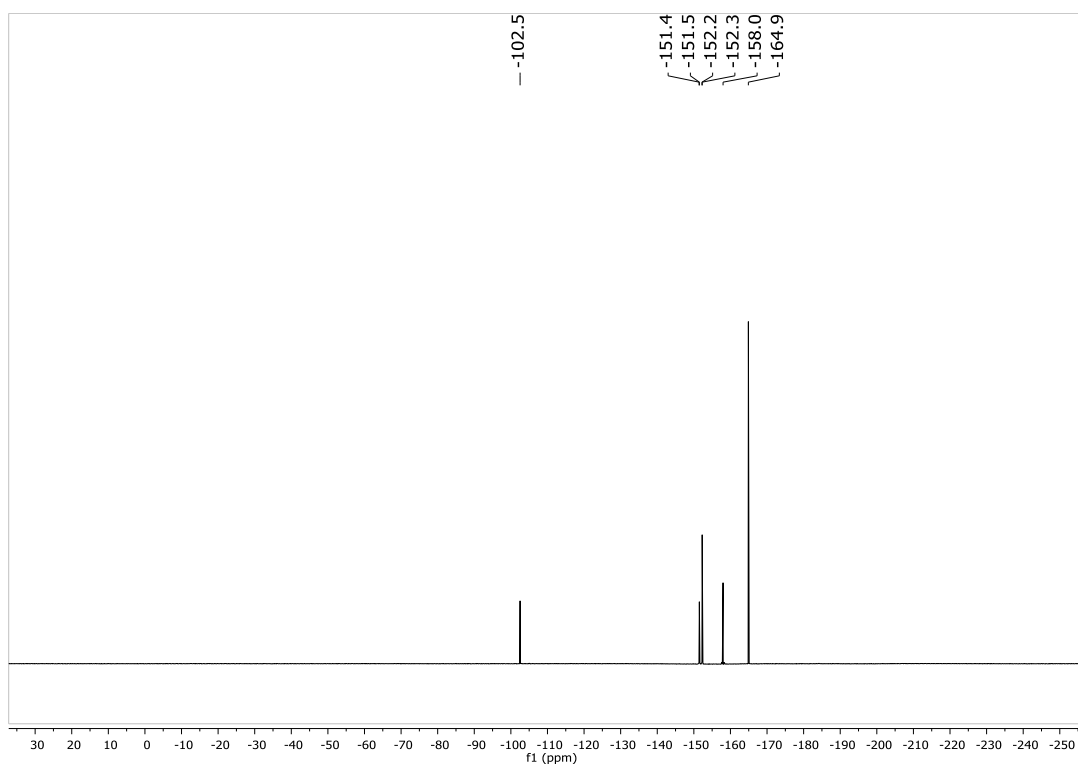

**Figure S5:**  $^{19}\text{F}$  NMR spectrum ( $\text{CD}_3\text{CN}$ , 470 MHz) after the addition of water.  $\text{C}_6\text{F}_6$  ( $\delta(^{19}\text{F}) = -164.9$  ppm) was used as internal standard.

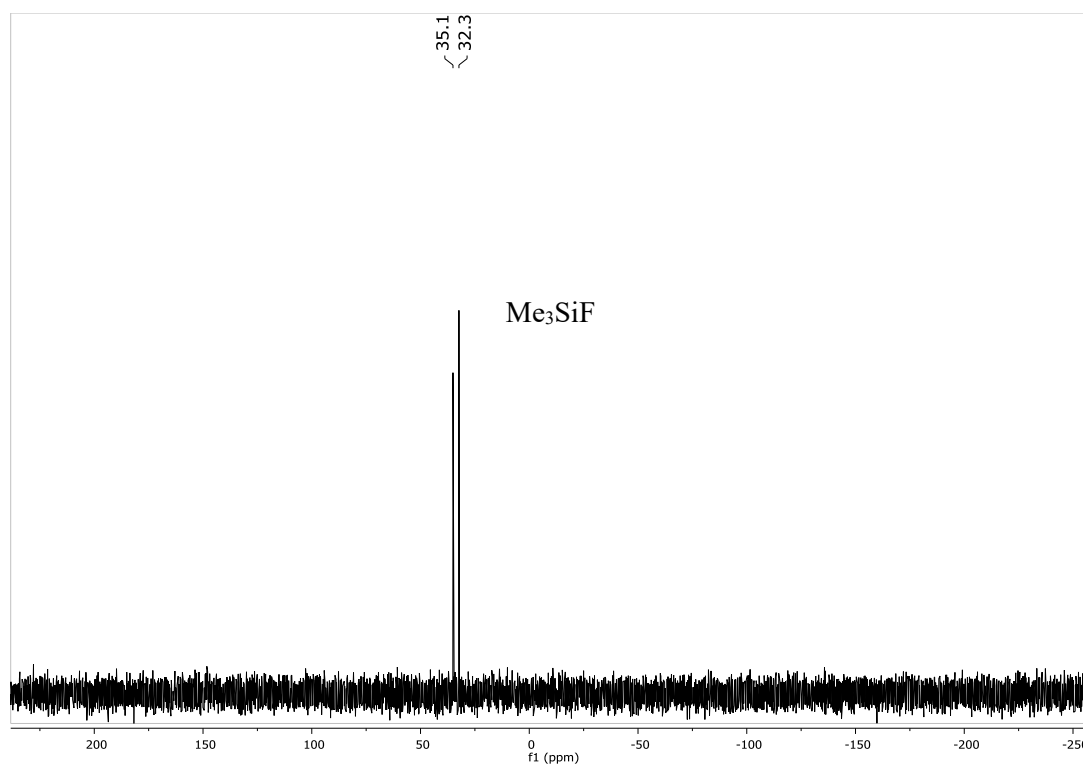

**Figure S6:**  $^{29}\text{Si}\{^1\text{H}\}$  NMR INEPT spectrum ( $\text{CD}_3\text{CN}$ , 99 MHz) after the addition of a small amount of water.

## Influence of NOBF<sub>4</sub> to the shift of the nitrosoarene **2m**

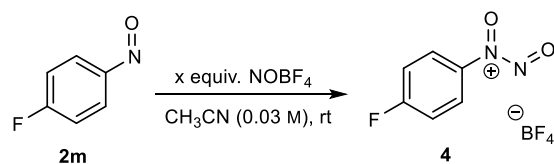

A round bottom flask was charged with acetonitrile (8.3 mL, 0.03 M), 1-fluoro-4-nitrosobenzene **2n** (52.2 mg, 0.42 mmol, 1.0 equiv.) and NOBF<sub>4</sub> (14.6 mg, 0.13 mmol, 0.3 equiv.) were added. A <sup>19</sup>F NMR spectrum of the reaction mixture was recorded and again NOBF<sub>4</sub> (14.6 mg, 0.13 mmol, 0.3 equiv.) was added. Once more a <sup>19</sup>F NMR spectrum of the reaction mixture was recorded. Slowly the amount of NOBF<sub>4</sub> was increased up to 35.0 equiv. (see Figure S8).

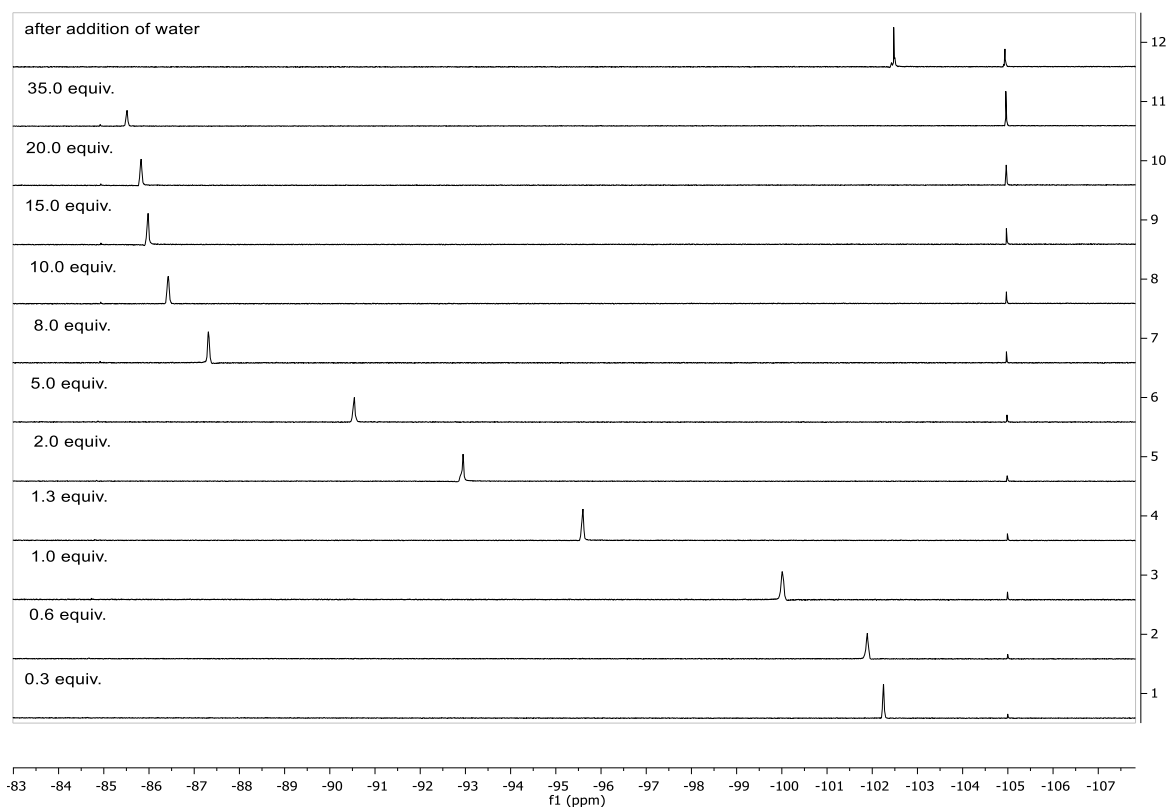

**Figure S7:** <sup>19</sup>F NMR shift of the nitrosoarene by increasing the amount of NOBF<sub>4</sub>. C<sub>6</sub>F<sub>6</sub> was used as internal standard ( $\delta(^{19}\text{F}) = -164.9$  ppm).

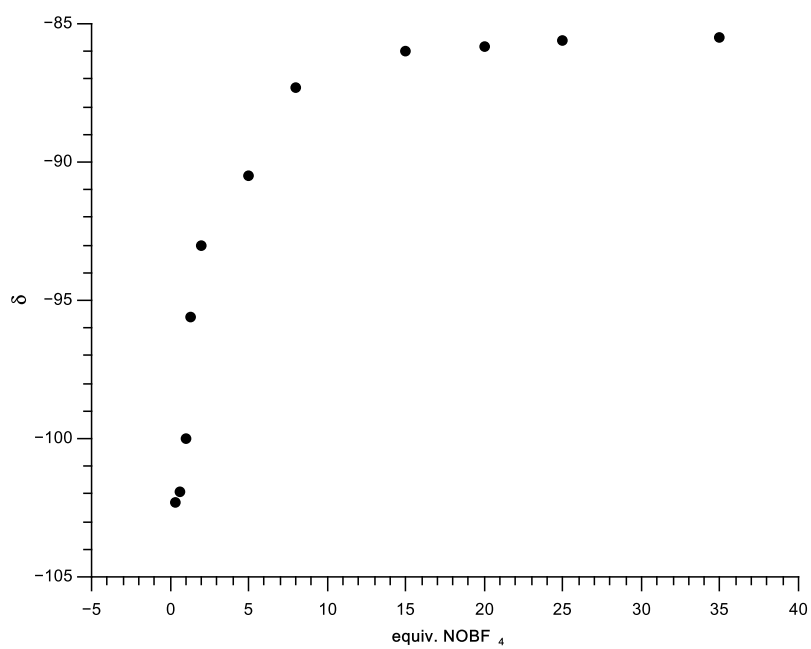

**Figure S8:** Plot of the chemical shift of the  $^{19}\text{F}$  NMR while increasing the amount of  $\text{NOBF}_4$ .



# NMR spectra

## Trimethyl(2,4,5-trimethylphenyl)silane (1e)

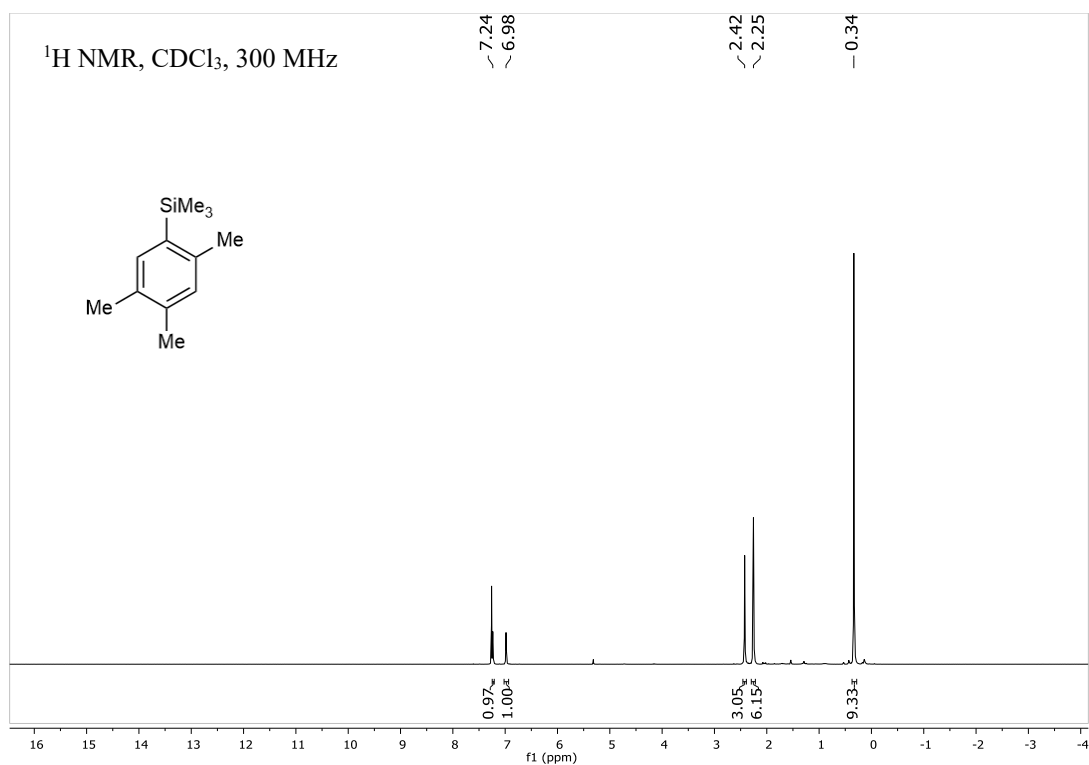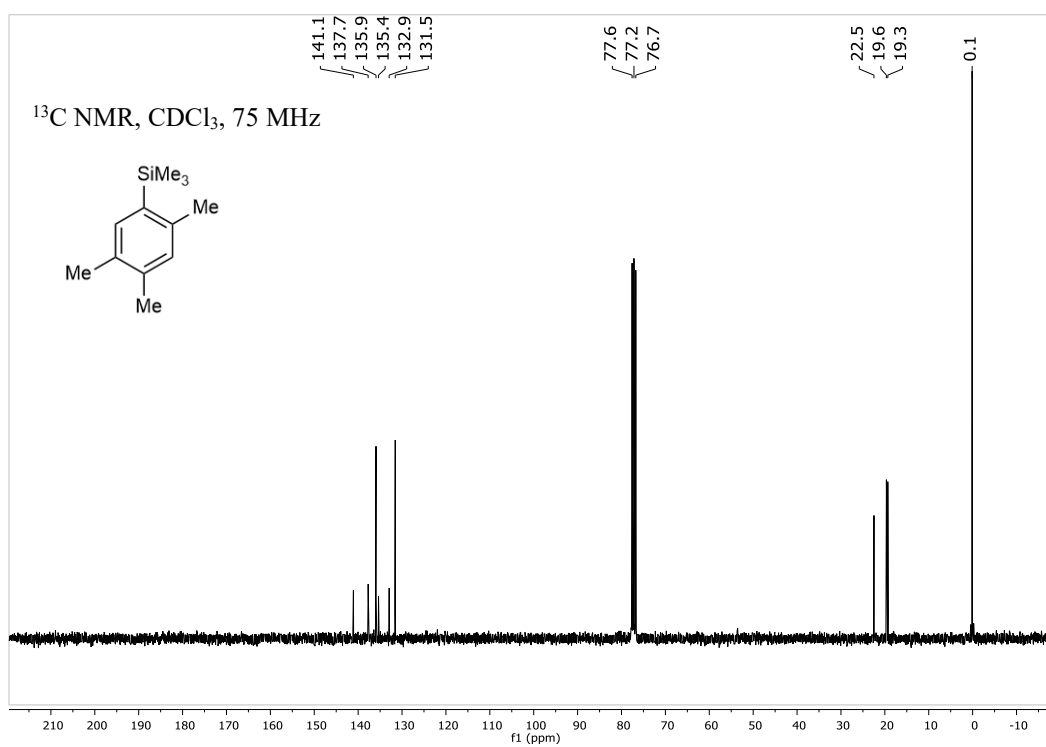

## 1-Methoxy-4-nitrosobenzene (2a)

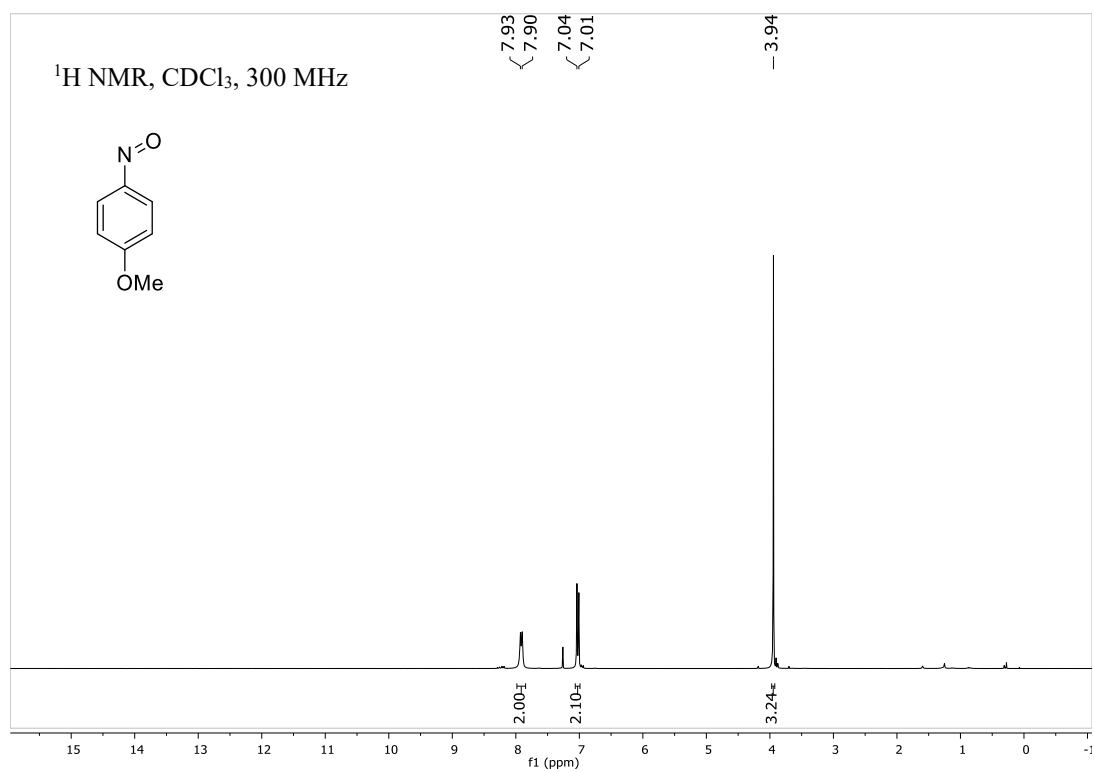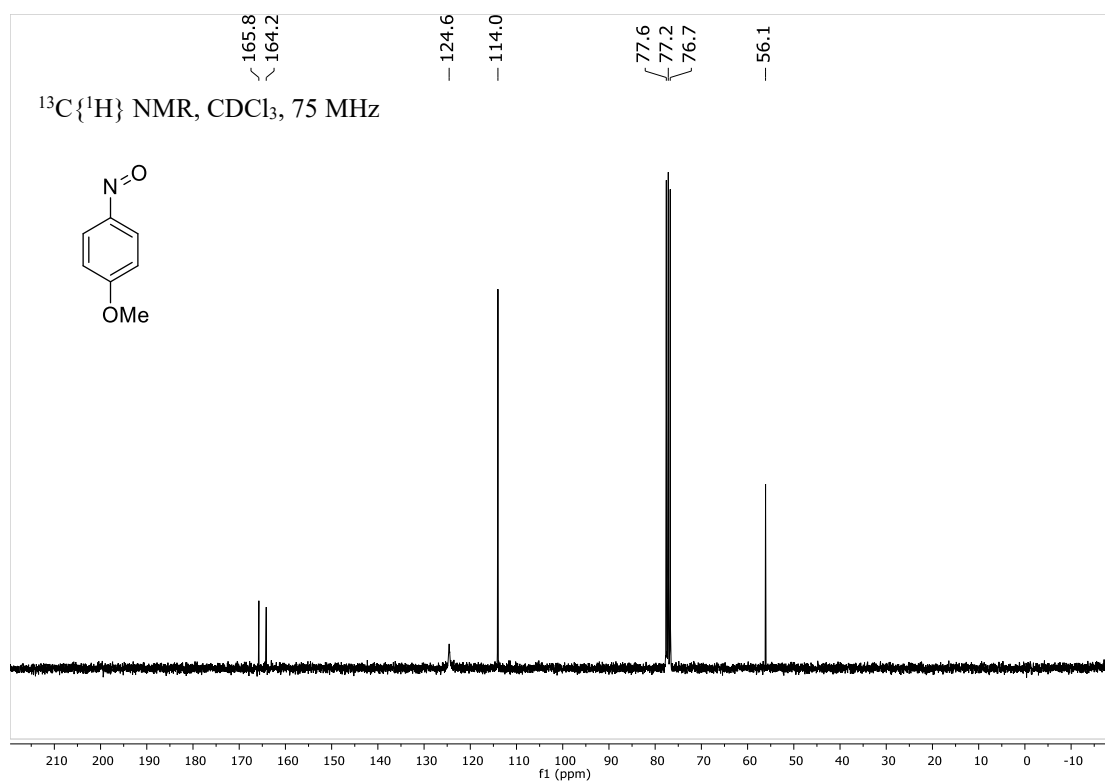

## 1,2-Dimethoxy-4-nitrosobenzene (2b)

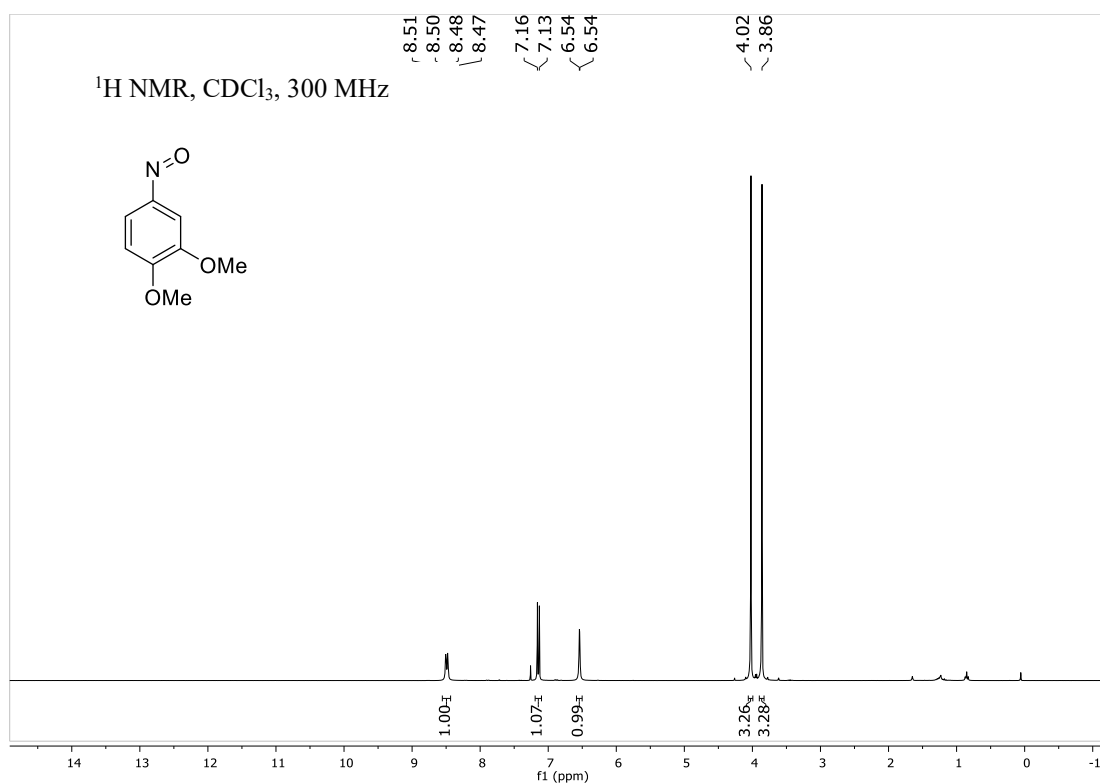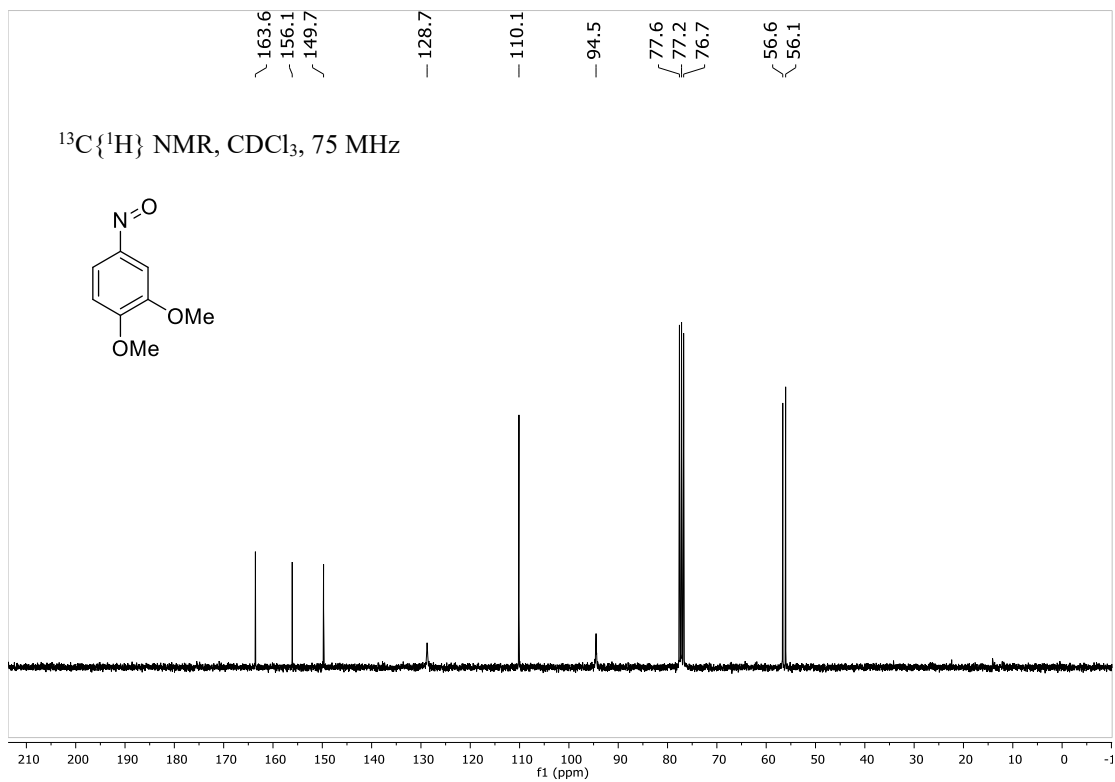

## 1-Methoxy-2-nitrosobenzene (2c)

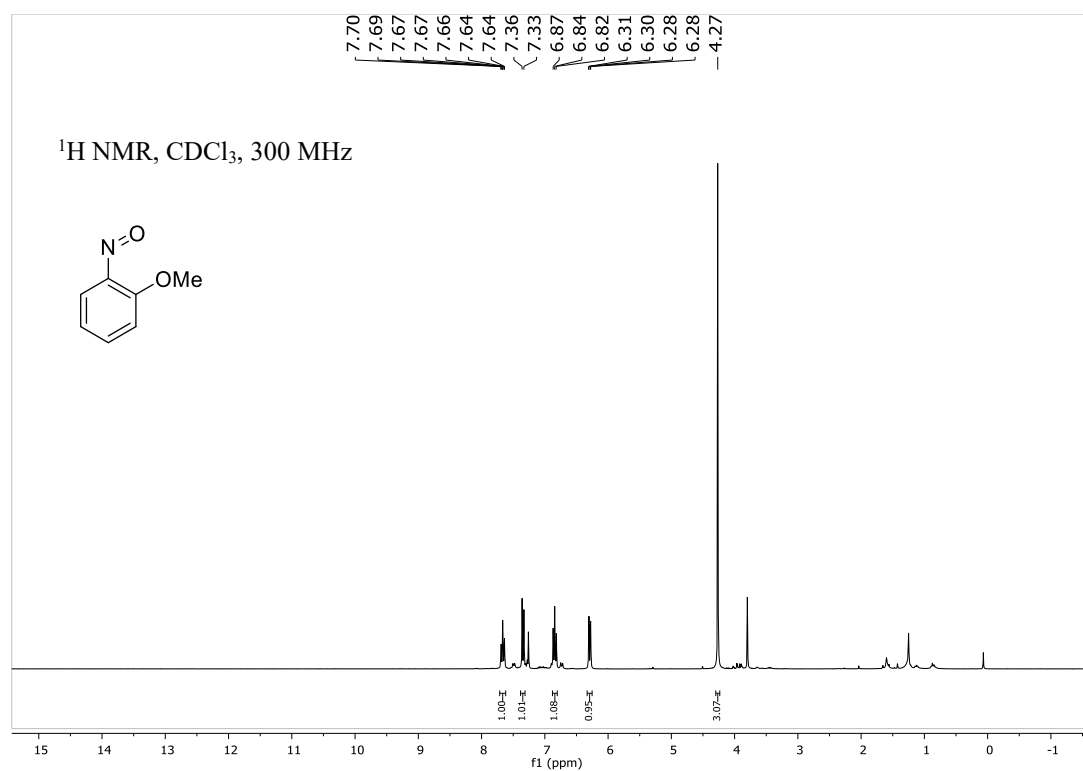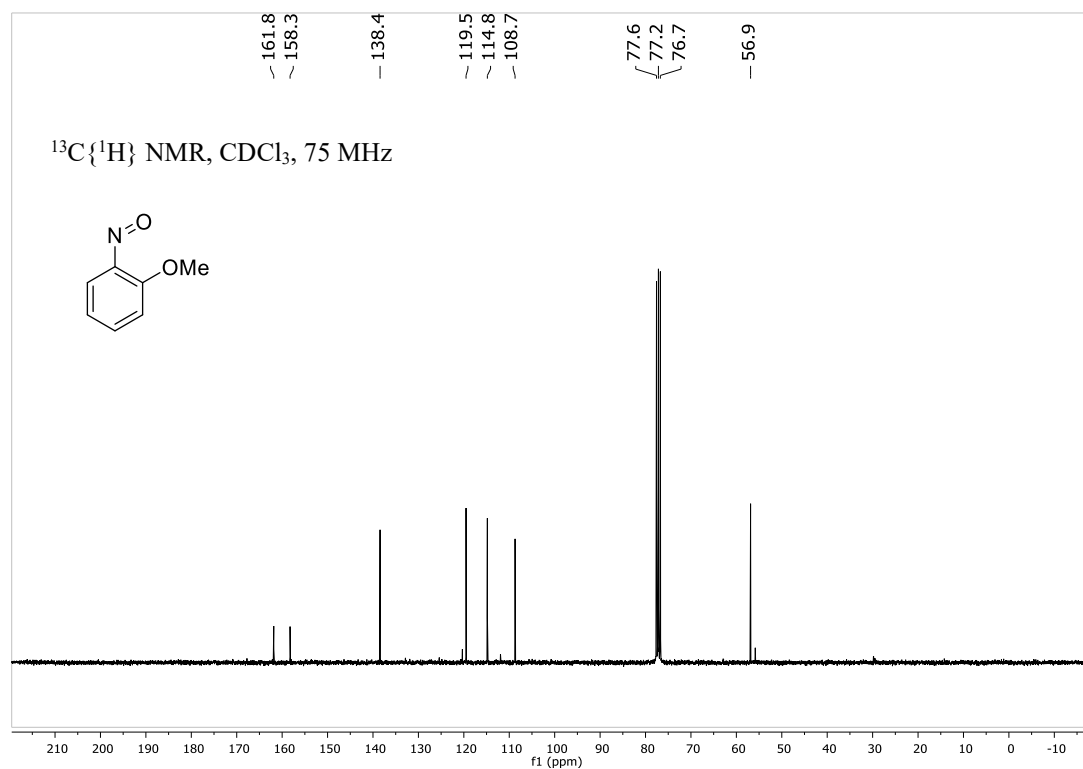

## (4-Fluorophenyl)trimethylsilane (2d)

The product contains 5% of 1-fluoro-4-nitrobenzene **3d**.

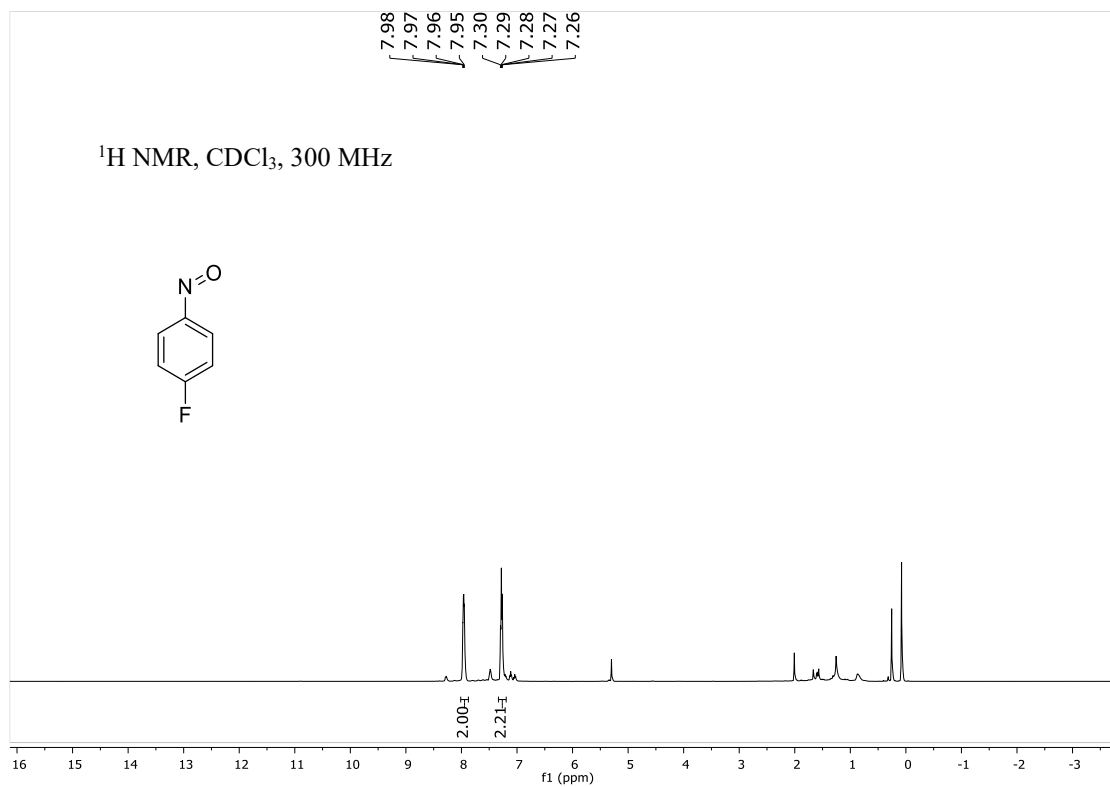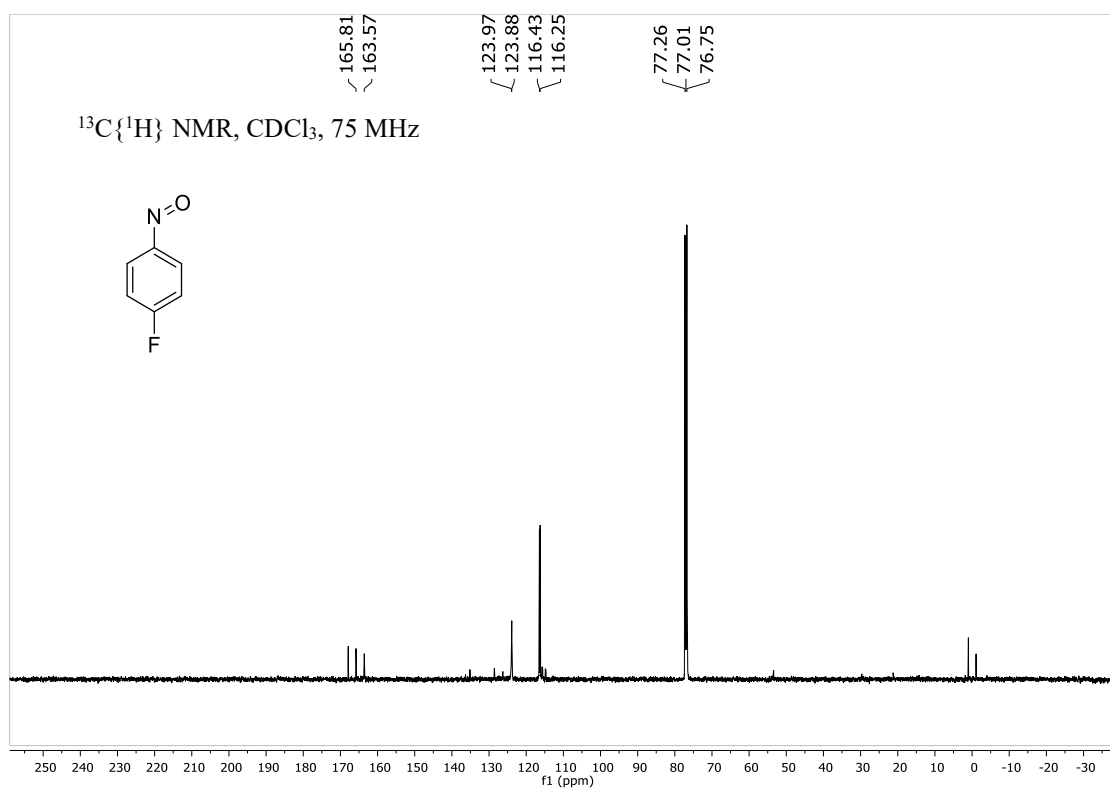

## 1,2,4-Trimethyl-5-nitrosobenzene (2f)

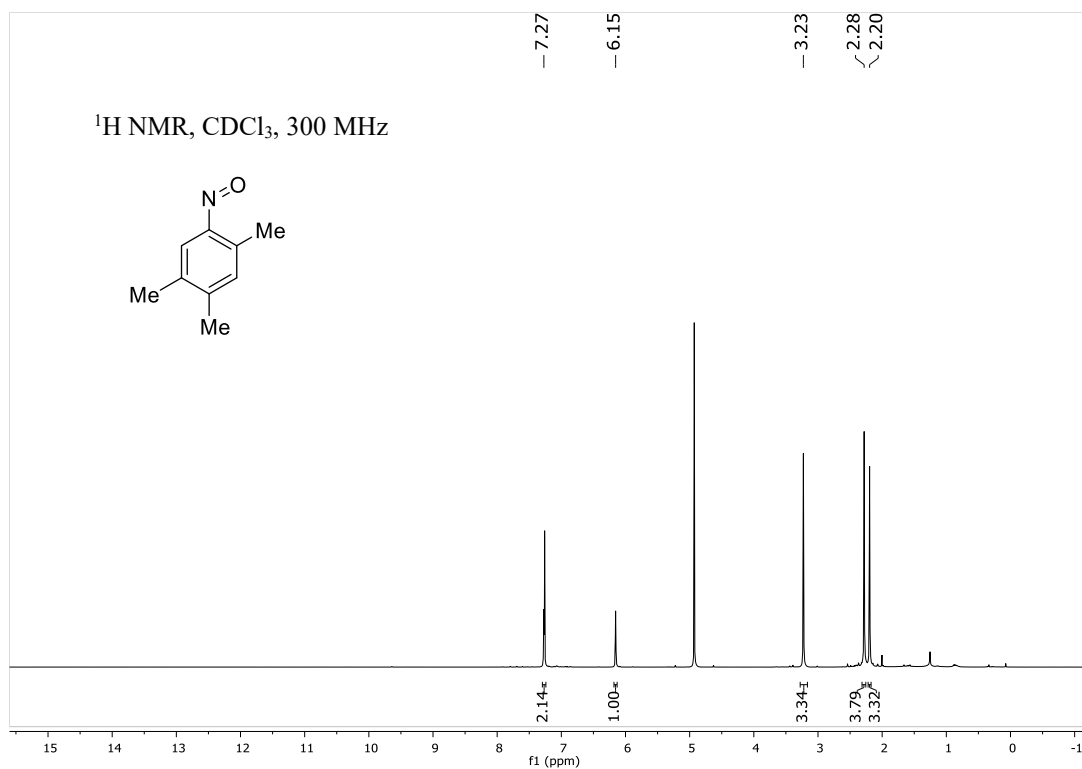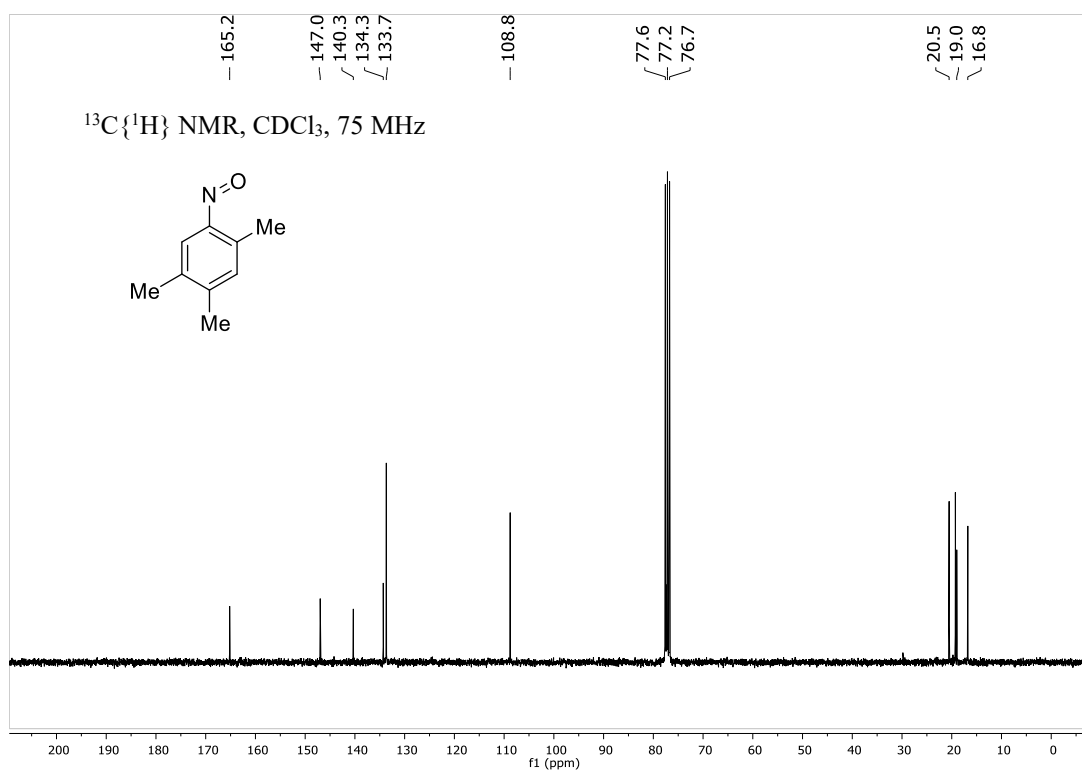

**1-Bromo-4-nitrosobenzene (2g)**

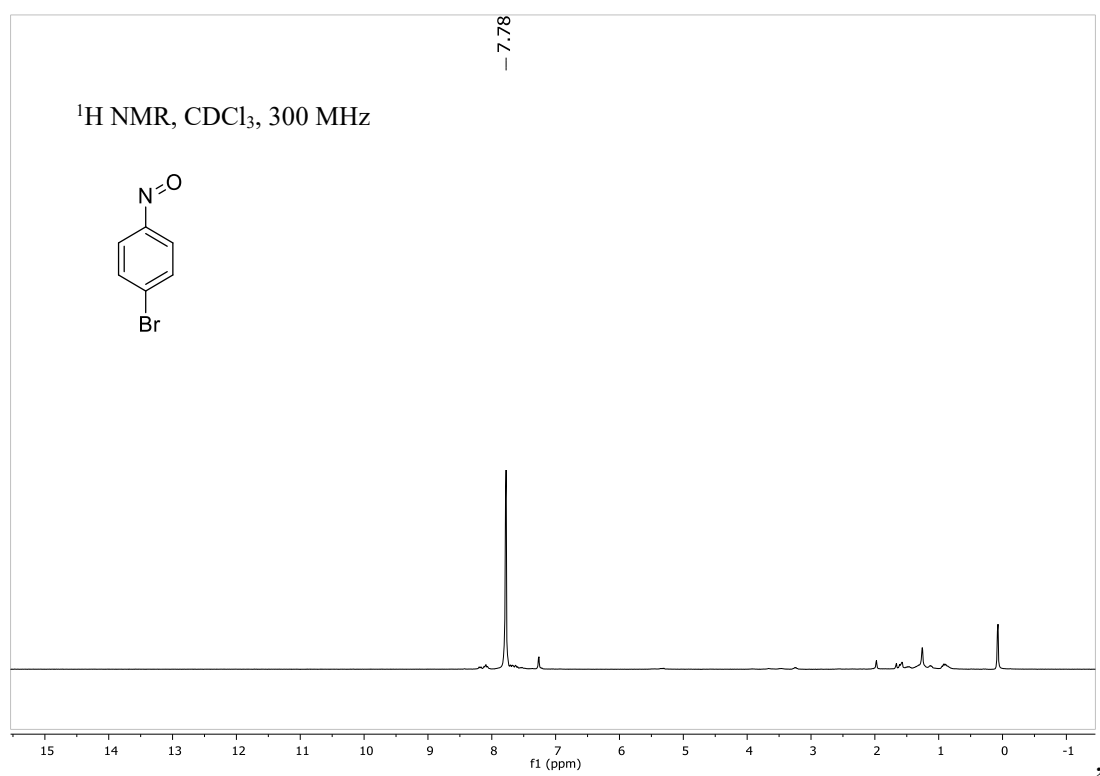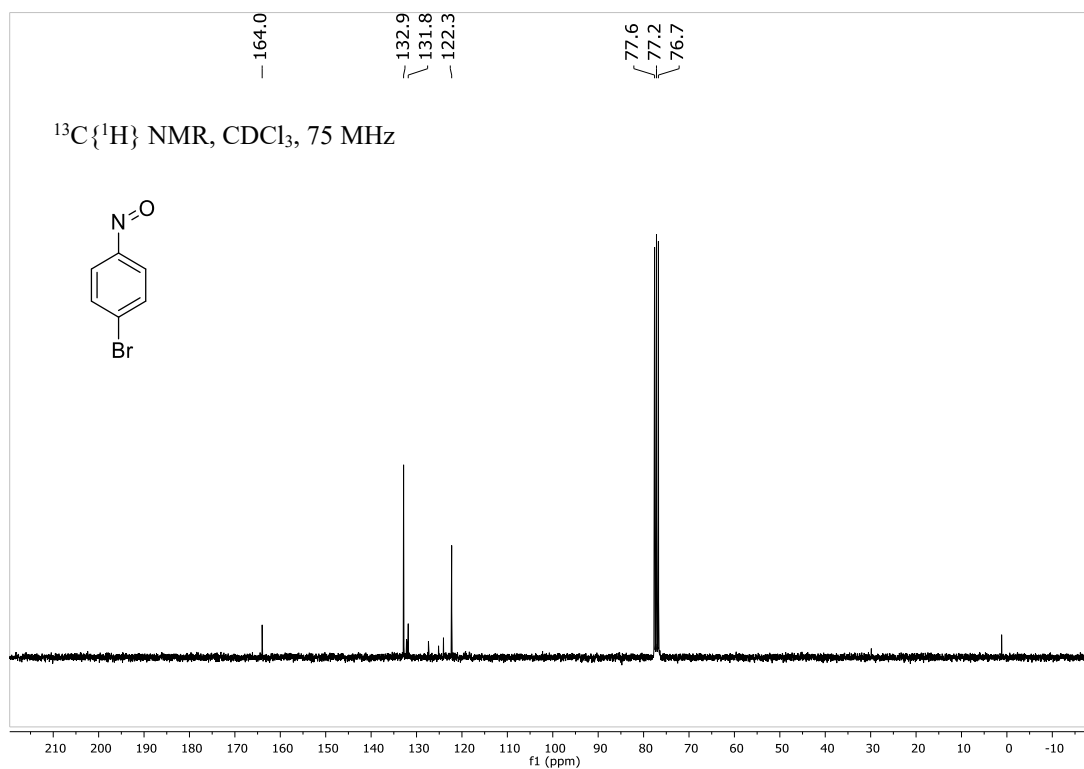

## 1-Methyl-4-nitrosobenzene (2h)

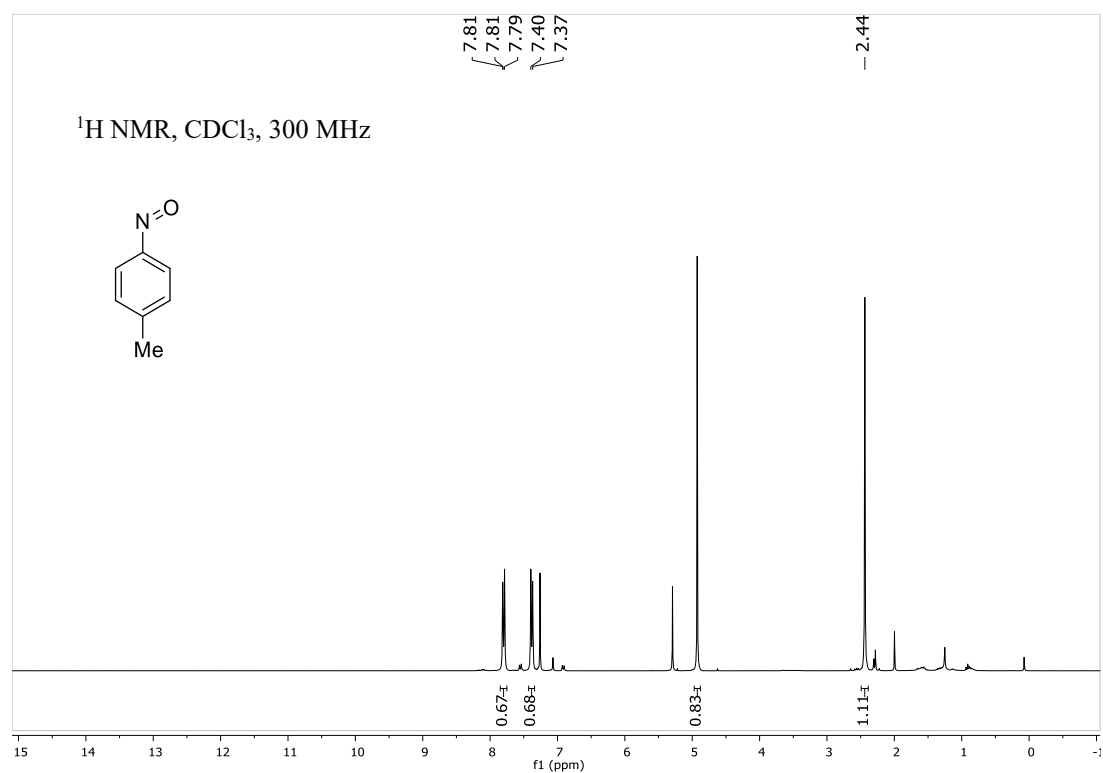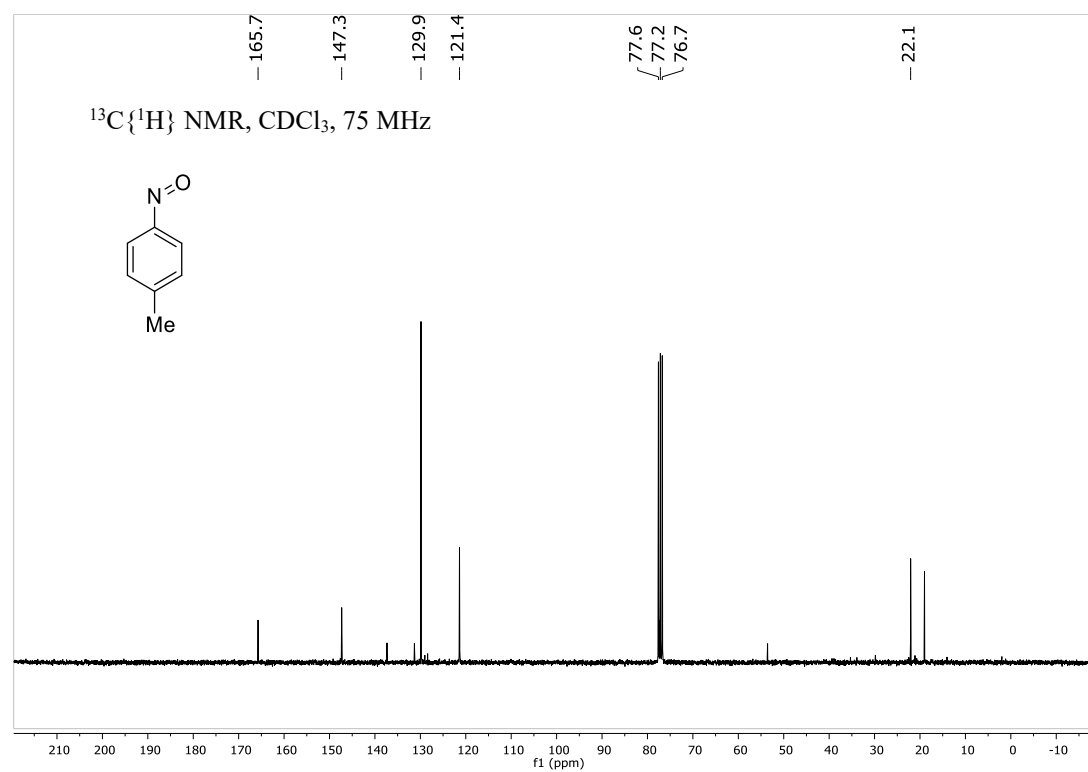



# 4-Nitroso-1,1'-biphenyl (2i)

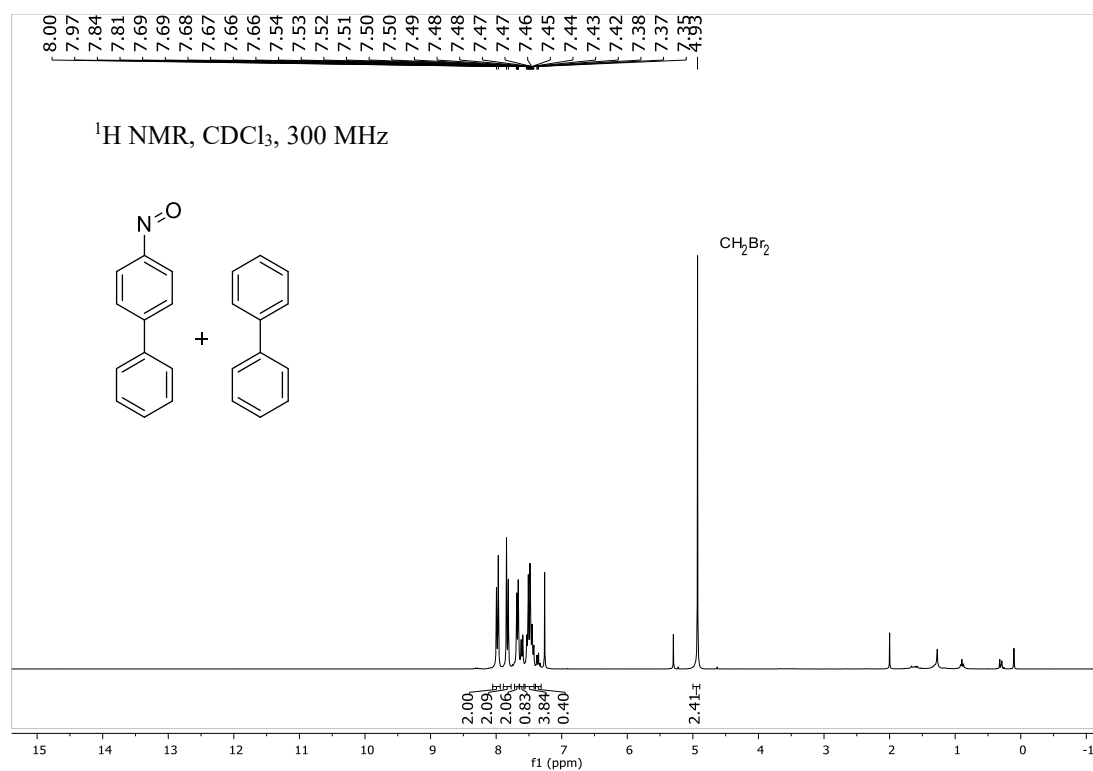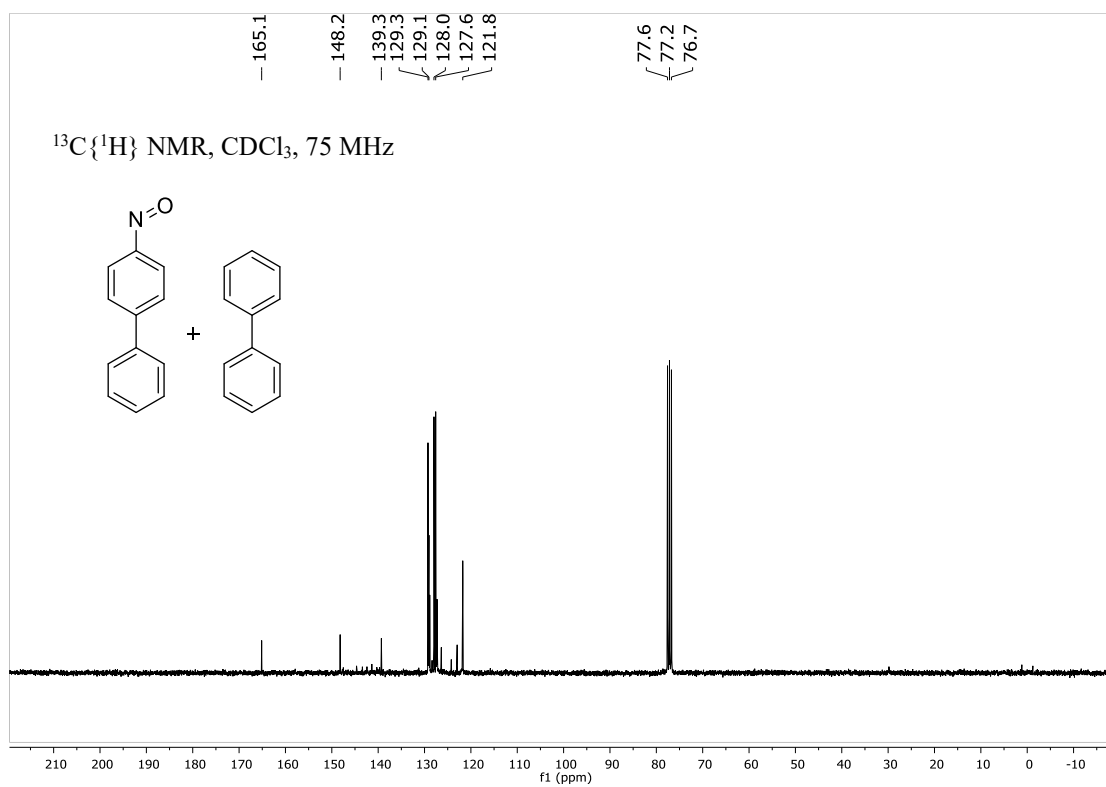

# 1,2-Dimethyl-4-nitrosobenzene (2j)

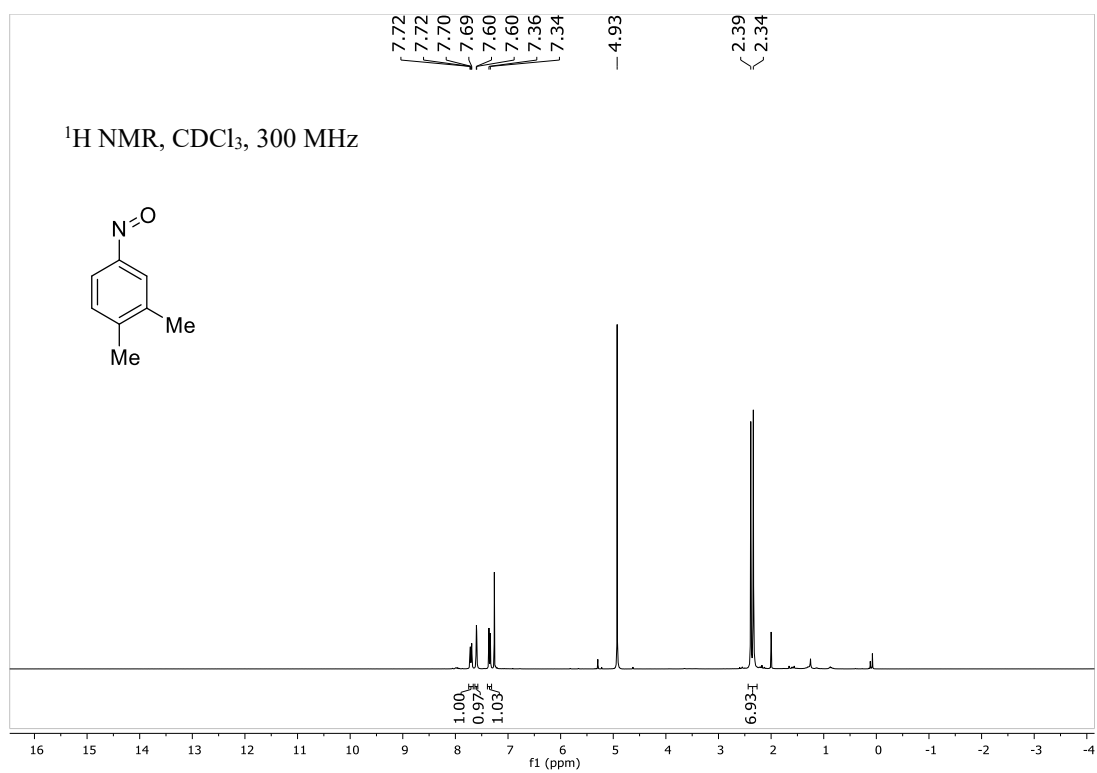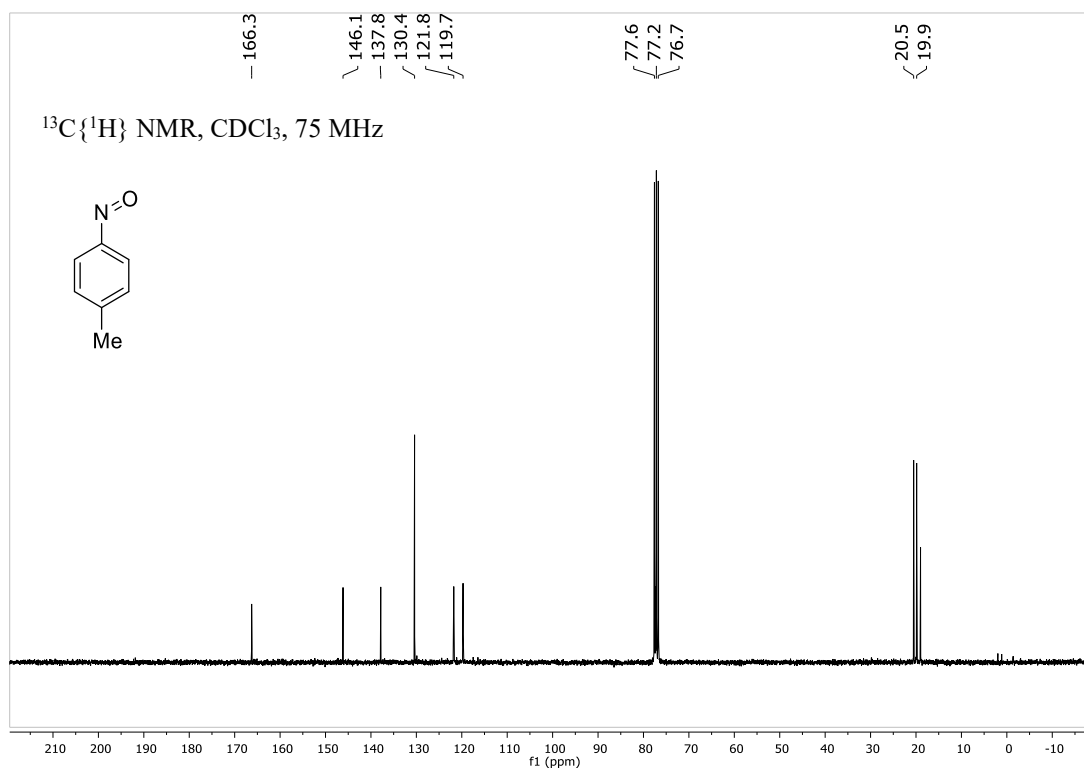

**5-Nitrosobenzo[d][1,3]dioxole (2k):**

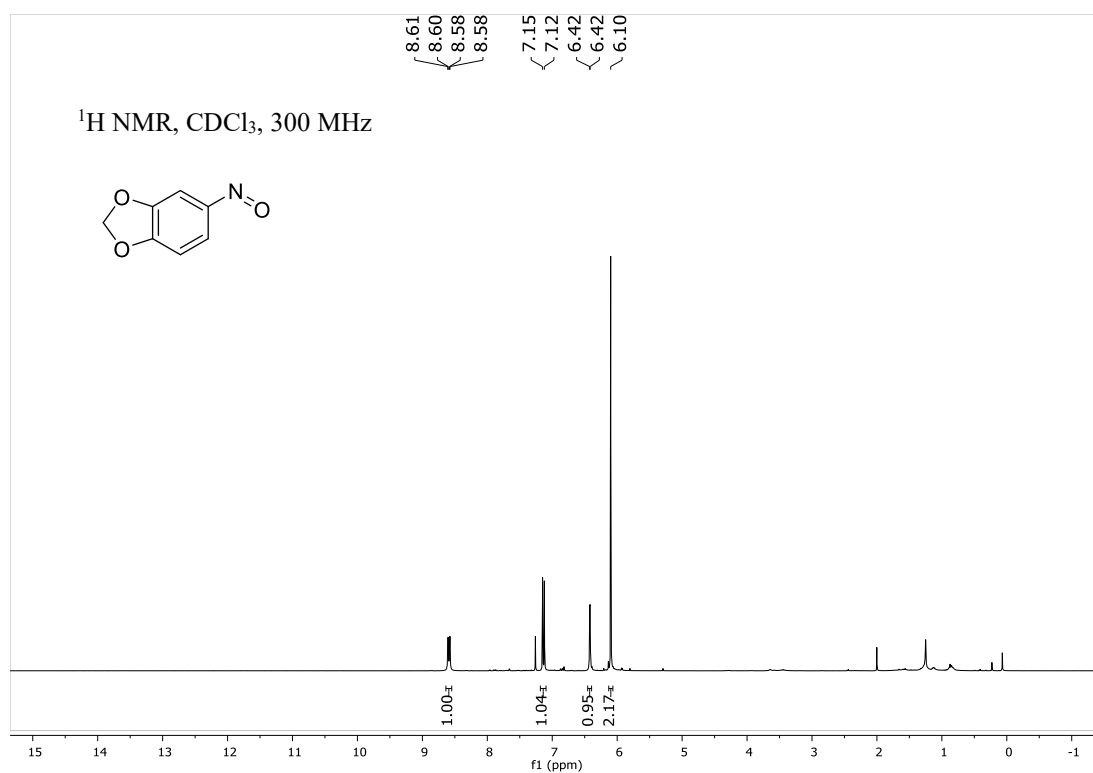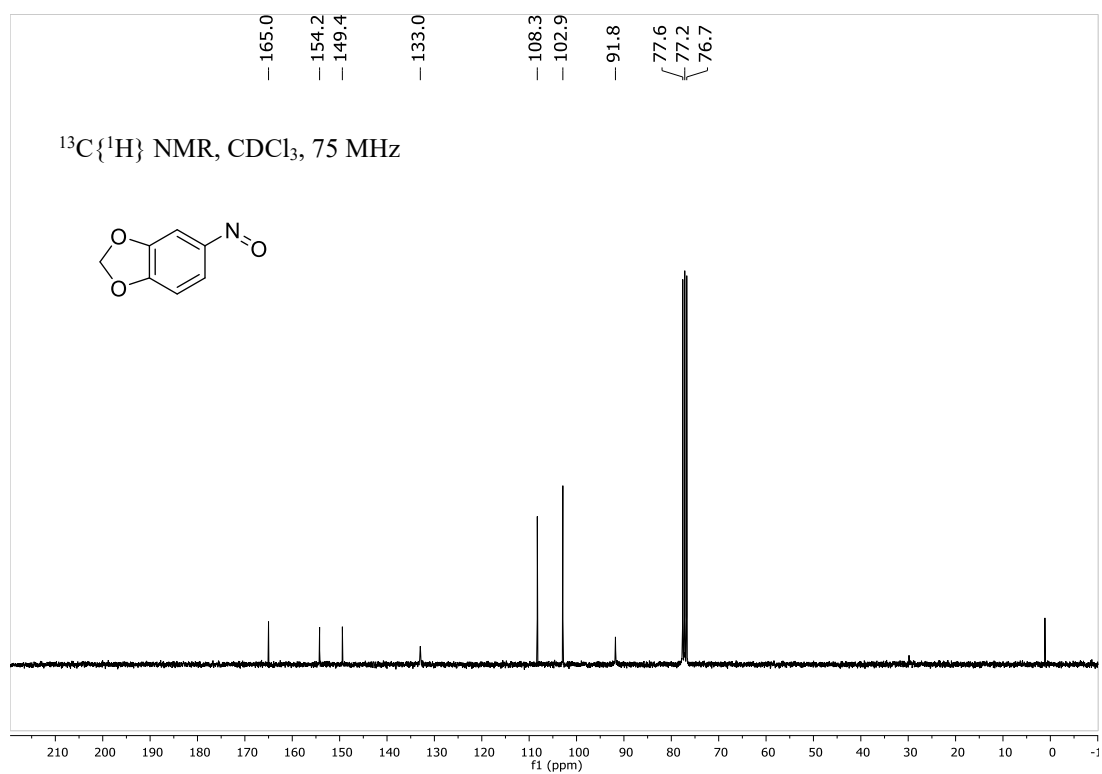

## References

- [1] Lehmann, M.; Schulz, A.; Villinger, A. *Angew. Chem. Int. Ed.* **2009**, *48*, 7444–7447.
